# Supplementary material for: Research on the Mechanism of Action of a Citrinin and Anti-Citrinin Antibody Based on Mimotope X27
Source: MDPI journal article supplement (doi:10.3390/toxins12100655), 2020-10-13
Supplement: s1 [file s1]

# Supplementary Materials: Research on the Mechanism of Action of Citrinin and Anti- Citrinin Antibody Based on Mimotope X27

Yanping Li, Yucheng Hu, Zhui Tu, Zhenqiang Ning, Qinghua He and Jinheng Fu

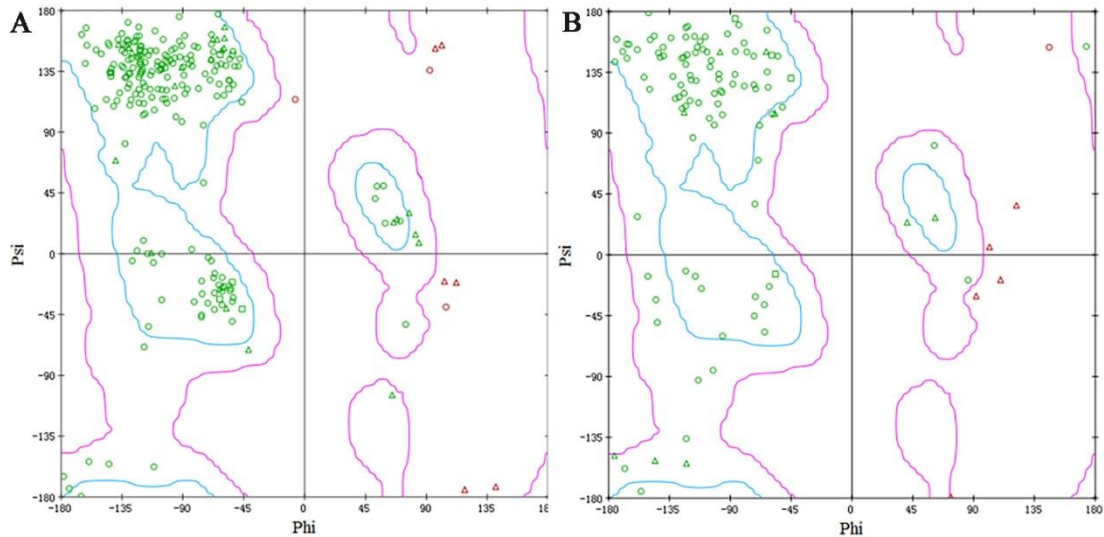

**Figure S1.** The Ramachandran Plot of the models of anti-CIT ScFv(A) and X27(B). Cyan region: Hardsphere, Magenta region: Overlap.

| Consensus    | MAEVQLVESGGGLVQAGGSLRLSCAGSGRFLFLYPM <sup>+</sup> SWFRQVPGKEREFVAEINW <sup>+</sup> SGSSTYYAD   |
|--------------|------------------------------------------------------------------------------------------------|
| 24 Sequences | 10 20 30 40 50 60                                                                              |
| 1. pro       | MAEVQLVESGGGLVQAGGSLRLSCAGSGRFSWKPM <sup>+</sup> SWFRQVPGKEREFVAEINW <sup>+</sup> SGSSTYYAD    |
| 2. pro       | MAEVQLVESGGGLVQAGGSLRLSCAGSGRFSKPYPM <sup>+</sup> SWFRQVPGKEREFVAEINW <sup>+</sup> SGSSTYYAD   |
| 3. pro       | MAEVQLVESGGGLVQAGGSLRLSCAGSGRSQPASPM <sup>+</sup> SWFRQVPGKEREFVAEINW <sup>+</sup> SGSSTYYAD   |
| 4. pro       | MAEVQLVESGGGLVQAGGSLRLSCAGSGRTFNRYPM <sup>+</sup> SWFRQVPGKEREFVAEINW <sup>+</sup> SGSSTYYAD   |
| 5. pro       | MAEVQLVESGGGLVQAGGSLRLSCAGSGREVFTLPMSW <sup>+</sup> FRQVPGKEREFVAEINW <sup>+</sup> SGSSTYYAD   |
| 6. pro       | MAEVQLVESGGGLVQAGGSLRLSCAGSGRLLHVPMSW <sup>+</sup> FRQVPGKEREFVAEINW <sup>+</sup> SGSSTYYAD    |
| 7. pro       | MAEVQLVESGGGLVQAGGSLRLSCAGSGRPTTMFPM <sup>+</sup> SWFRQVPGKEREFVAEINW <sup>+</sup> SGSSTYYAD   |
| 8. pro       | MAEVQLVESGGGLVQAGGSLRLSCAGSGRF. WLLPM <sup>+</sup> SWFRQVPGKEREFVAEINW <sup>+</sup> SGSSTYYAD  |
| 9. pro       | MAEVQLVESGGGLVQAGGSLRLSCAGSGRTFNRYPM <sup>+</sup> SWFRQVPGKEREFVAEINW <sup>+</sup> SGSSTYYAD   |
| 10. pro      | MAEVQLVESGGGLVQAGGSLRLSCAGSGRILILFPM <sup>+</sup> SWFRQVPGKEREFVAEINW <sup>+</sup> SGSSTYYAD   |
| 11. pro      | MAEVQLVESGGGLVQAGGSLRLSCAGSGRFR <sup>+</sup> TCLPMSWFRQVPGKEREFVAEINW <sup>+</sup> SGSSTYYAD   |
| 12. pro      | MAEVQLVESGGGLVQAGGSLRLSCAGSGRWRDRGPPMSW <sup>+</sup> FRQVPGKEREFVAEINW <sup>+</sup> SGSSTYYAD  |
| 13. pro      | MAEVQLVESGGGLVQAGGSLRLSCAGSGRSFFCYPM <sup>+</sup> SWFRQVPGKEREFVAEINW <sup>+</sup> SGSSTYYAD   |
| 14. pro      | MAEVQLVESGGGLVQAGGSLRLSCAGSGRPFWLRPM <sup>+</sup> SWFRQVPGKEREFVAEINW <sup>+</sup> SGSSTYYAD   |
| 15. pro      | MAEVQLVESGGGLVQAGGSLRLSCAGSGRSP <sup>+</sup> . KPMSWFRQVPGKEREFVAEINW <sup>+</sup> SGSSTYYAD   |
| 16. pro      | MAEVQLVESGGGLVQAGGSLRLSCAGSGRLLF. NPMSW <sup>+</sup> FRQVPGKEREFVAEINW <sup>+</sup> SGSSTYYAD  |
| 17. pro      | MAEVQLVESGGGLVQAGGSLRLSCAGSGRSYWLGPMSW <sup>+</sup> FRQVPGKEREFVAEINW <sup>+</sup> SGSSTYYAD   |
| 18. pro      | MAEVQLVESGGGLVQAGGSLRLSCAGSGRAFNRYPMSW <sup>+</sup> FRQVPGKEREFVAEINW <sup>+</sup> SGSSTYYAD   |
| 19. pro      | .IAEVQLVESGGGLVQAGGSLRLSCAGSGR <sup>+</sup> FHLGVPMSWFRQVPGKEREFVAEINW <sup>+</sup> SGSSTYYAD  |
| 20. pro      | .IAEVQLVESGGGLVQAGGSLRLSCAGSGRLLSGSPMSW <sup>+</sup> FRQVPGKEREFVAEINW <sup>+</sup> SGSSTYYAD  |
| 21. pro      | MAEVQLVESGGGLVQAGGSLRLSCAGSGRWPFGIPMSW <sup>+</sup> FRQVPGKEREFVAEINW <sup>+</sup> SGSSTYYAD   |
| 22. pro      | MAEVQLVESGGGLVQAGGSLRLSCAGSGRF. LS. PMSW <sup>+</sup> FRQVPGKEREFVAEINW <sup>+</sup> SGSSTYYAD |
| 23. pro      | MAEVQLVESGGGLVQAGGSLRLSCAGSGRF. .LIPMSW <sup>+</sup> FRQVPGKEREFVAEINW <sup>+</sup> SGSSTYYAD  |
| 24. pro      | MAEVQLVESGGGLVQAGGSLRLSCAGSGRILWCSPMSW <sup>+</sup> FRQVPGKEREFVAEINW <sup>+</sup> SGSSTYYAD   |

**Figure S2.** Sequence analysis of 24 clones from Site-directed saturation library.

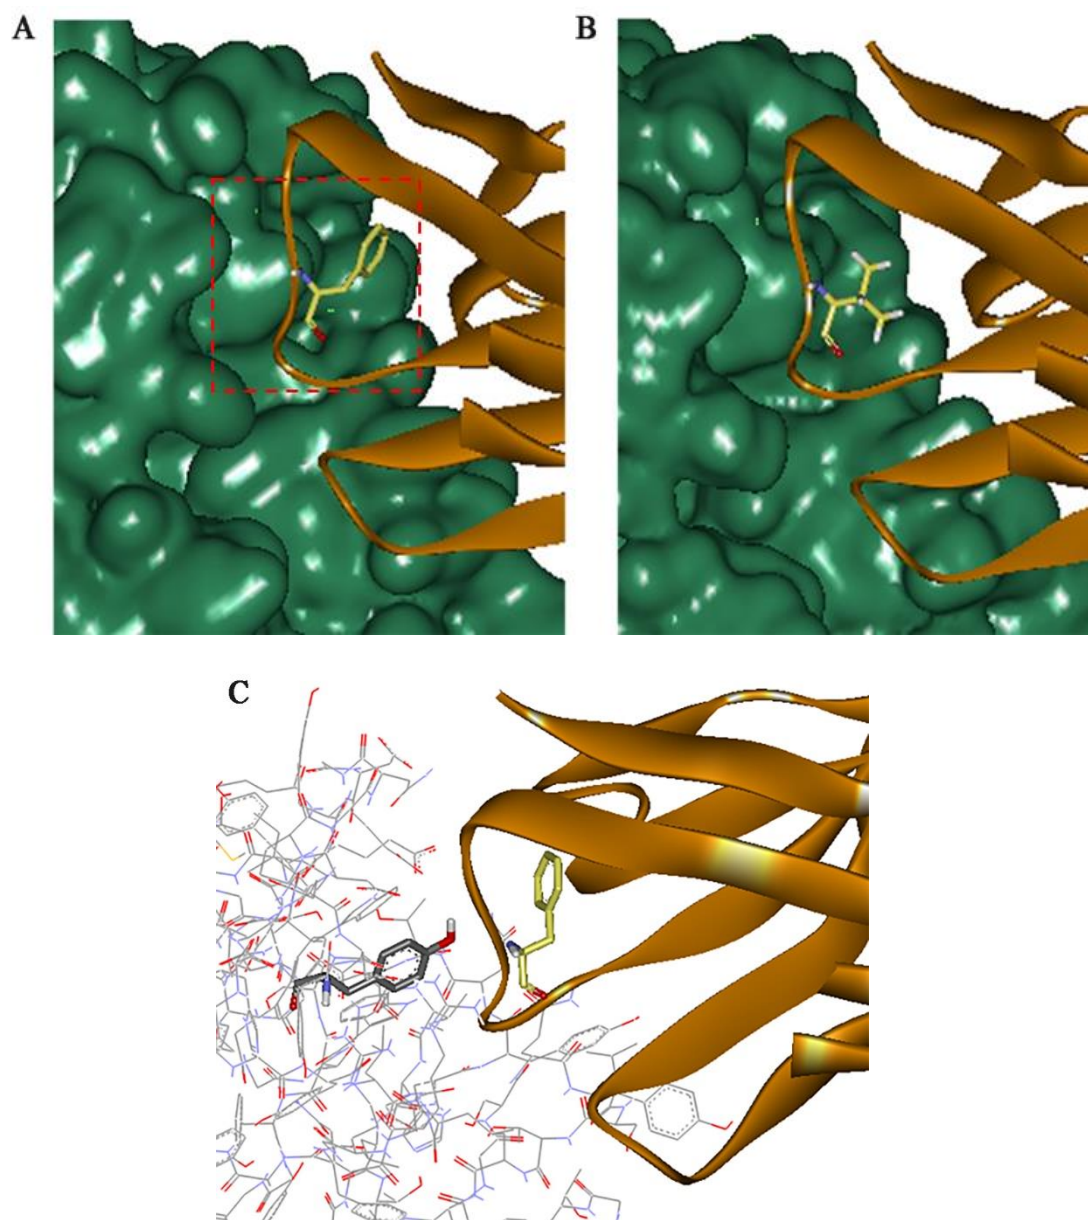

**Figure S3.** The Docking results of anti-CIT ScFv(A) and F29V-ScFv(B). (C) An enlarged view of the dotted box part in panel A.
